# Supplementary material for: Adjusting advance care planning to older people’s needs: results from focus groups and interviews
Source: Springer Nature journal article supplement (doi:10.1186/s12913-023-10491-x), 2024-01-10
Supplement: MOESM2 [file 26614694]

## Supplement: Interview questions for focus groups and individual interviews

### Preparation of focus groups and interviews

- Send out invitations including information about the study and the voluntary participation.
- Provide information letter. Participants sign the informed consent form for participation in the study and fill in the STEM questionnaire.

### Interview questions (focus group session of about 2,5 hrs or individual interview)

Ask if the study may be audio-recorded. (The recording are deleted after the termination of the study).  
Read out a short description of an older person based on the STEM profile and introduce the following case:

*A person comes out of hospital. He/she had covid-19 and has lost a lot in terms of fitness, also has a bad heart and incipient cataracts.*

Then discuss the questions below:

1. What role does the *social network* of this person play in making important care decisions?  
Sub-questions:
  - a. With whom does he/she talk about health and care decisions?
  - b. Who may possibly make care decisions for him/her?
  - c. Whom can he/she ask for help? Who takes care of him/her, if anyone?
  - d. To what extent does he/she accept help from the network?
2. What role do *health professionals* of play in making important care decisions?  
Sub-questions:
  - a. Which professionals does he/she like to talk to? Only the GP or also others?
  - b. Does he/she only talk about health or also about future care wishes?
  - c. What are the needs of him/her for having a good conversation and for making decisions about future care wishes?
3. What *sources of information* does he/she use concerning important decision about care and/or health?
  - a. Select five relevant sources of information on the provided list of possible information sources.
  - b. Ask for a top 3
  - c. How would you prefer to be addressed?
4. What does he/she consider *important aspects* concerning care wishes?
  - a. Extending life 0—10—20—30—40—50—60—70—80—90—100
  - b. Maintaining independence 0—10—20—30—40—50—60—70—80—90—100
  - c. Reducing pain 0—10—20—30—40—50—60—70—80—90—100
  - d. Reducing other symptoms 0—10—20—30—40—50—60—70—80—90—100
5. What should a healthcare professional *absolutely not do* when discussing care wishes? What is perceived as annoying?

Summarize the key elements collected during the session describing a prototypical older person (reflecting one of the 5 STEM profiles).

6. Can you identify with this description? Is there anything, you would like to add or change?
